# Supplementary material for: Enrichment of psychrophilic and acidophilic sulfate-reducing bacterial consortia – a solution toward acid mine drainage treatment in cold regions
Source: Royal Society of Chemistry journal article supplement (doi:10.1039/d1em00256b), 2021-01-01
Supplement: d1em00256b1.pdf [file d1em00256b1.pdf]

## Supplementary information

### Development of Psychrophilic and Extremely Acidophilic Sulfate-Reducing Bacterial Consortium - A Solution Toward Acid Mine Drainage Treatment in Cold Regions

Subhabrata Dev<sup>a,b\*</sup>, Miranda Galey<sup>c</sup>, Chan Lan Chun<sup>c,d</sup>, Chad Novotny<sup>e</sup>, Tathagata Ghosh<sup>b</sup>,  
Srijan Aggarwal<sup>a,f\*</sup>

<sup>a</sup>Water and Environmental Research Center, University of Alaska Fairbanks, Fairbanks, AK  
99775, United States

<sup>b</sup>Mineral Industry Research Laboratory, University of Alaska Fairbanks, Fairbanks, AK 99775,  
United States

<sup>c</sup>Natural Resources Research Institute, University of Minnesota Duluth, Duluth, MN 55812,  
United States

<sup>d</sup>Department of Civil Engineering, University of Minnesota Duluth, Duluth, MN 55812, United  
States

<sup>e</sup>Teck Resources Limited, Vancouver, BC V6C 0B3, Canada

<sup>f</sup>Department of Civil and Environmental Engineering, University of Alaska Fairbanks,  
Fairbanks, Alaska, 99775, United States

*Submitted to Environmental Science: Processes and Impacts*

*\*Corresponding authors*

Subhabrata Dev, 1760 Tanana Loop, University of Alaska Fairbanks, Fairbanks, AK 99775,  
Email: sdev@alaska.edu,

Srijan Aggarwal, 1764 Tanana Loop, University of Alaska Fairbanks, Fairbanks, AK 99775,  
Email: saggarwal@alaska.edu

36 **Table S1.** Composition of the nutrient supplements <sup>1</sup> used for enriching microorganism in the  
 37 batch microcosm experiment.

| <b>Trace element solution</b>                                     |            |
|-------------------------------------------------------------------|------------|
| <b>Elements</b>                                                   | <b>g/L</b> |
| FeCl <sub>2</sub> ,4H <sub>2</sub> O                              | 1.5        |
| CoCl <sub>2</sub> ,6H <sub>2</sub> O                              | 0.19       |
| MnCl <sub>2</sub> , 6H <sub>2</sub> O                             | 0.1        |
| ZnCl <sub>2</sub>                                                 | 0.07       |
| H <sub>3</sub> BO <sub>3</sub>                                    | 0.062      |
| Na <sub>2</sub> MoO <sub>4</sub> , 2H <sub>2</sub> O              | 0.036      |
| NiCl <sub>2</sub> , 6H <sub>2</sub> O                             | 0.024      |
| CuCl <sub>2</sub> , 2H <sub>2</sub> O                             | 0.017      |
| The trace element solution should be added as 1mL/L of the medium |            |
| <b>Vitamin mix solution</b>                                       |            |
| Vitamins                                                          | g/L        |
| Biotin                                                            | 0.001      |
| Ca-Patathenate                                                    | 0.001      |
| 4-aminobenzoic acid                                               | 0.005      |
| Pyridoxamine                                                      | 0.025      |
| Nicotinic acid                                                    | 0.01       |
| Thiamine                                                          | 0.002      |
| The vitamin solution should be added as 5 mL/L of the medium      |            |
| <b>Vitamin B12 solution</b>                                       |            |
| Vitamin B12 (g/L)                                                 | 0.005      |
| The vitamin B12 solution should be added as 1 mL/L of the medium  |            |

39 **Table S2.** Characterization of water from PL and ARD collection locations

| <b>Parameters</b>    | <b>PL</b>  | <b>AMD</b>   |
|----------------------|------------|--------------|
| pH                   | 3.3        | 2.4          |
| Temperature (°C)     | 13.7       | 22.1         |
| DO (mg/L)            | 6.8        | 4.9          |
| Conductivity (µS/cm) | 3448       | 19817        |
| Sulfate (mg/L)       | 3059 ± 28  | 36507 ± 709  |
| Mg (mg/L)            | 145.2± 1.2 | 1633.4± 12.4 |
| Fe (mg/L)            | 63.7± 1.1  | 2368.5± 36.7 |
| Al (mg/L)            | 4.6± 0.4   | 549.6± 42.5  |
| Zn (mg/L)            | 661.1± 0.5 | 6082.2± 24.9 |
| Mn (mg/L)            | 33.6± 0.3  | 580.2± 2.1   |

40 ± indicates standard deviation.

41

42 **Table S3.** Changes in pH during the batch microcosm study and stoichiometric total bicarbonate  
 43 production due to glycerol oxidation coupled to sulfate reduction. The stoichiometric calculation  
 44 was performed following the biochemical reaction<sup>90</sup> coupling sulfate reduction and glycerol  
 45 oxidation.

| <b>Stage</b> | <b>Sample</b> | <b>Bicarbonate<br/>(mg/L as HCO<sub>3</sub><sup>-</sup>)</b> | <b>Initial pH</b> | <b>Final pH</b> | <b>Change in pH<br/>(ΔpH)</b> |
|--------------|---------------|--------------------------------------------------------------|-------------------|-----------------|-------------------------------|
| 1            | PA            | 869.13±4.4                                                   | 4.5               | 7.4             | 2.9                           |
|              | PN            | 1022.1±1.2                                                   | 7                 | 8.1             | 1.1                           |
|              | AA            | 601.1±130.1                                                  | 4.5               | 7.2             | 2.6                           |
|              | AN            | 507.5±26.5                                                   | 7                 | 7.6             | 0.6                           |
| 2            | PAC1          | 1139.6±25.9                                                  | 4.5               | 7.2             | 2.7                           |
|              | PAC2          | 1212.6±40.8                                                  | 3                 | 7.1             | 4.1                           |
|              | PACS1         | 370.1±15.8                                                   | 4.5               | 6.2             | 1.7                           |
| 3            | PAC1S1        | 233.9±1.33                                                   | 4.5               | 5.3             | 0.8                           |
|              | PAC2S1        | 111.5±4.5                                                    | 3                 | 3.6             | 0.6                           |
|              | PACS2         | 425.8±3.9                                                    | 4.5               | 6.1             | 1.6                           |

47

**Table S4.** Metal removal capacity of the inoculum grown in different condition

| Sample | Metal removal (%) |      |          |          |      |
|--------|-------------------|------|----------|----------|------|
|        | Ca                | Zn   | Mg       | Mn       | Fe   |
| PN     | 60.9±1            | NA*  | 46.2±0.5 | 99.5     | NA*  |
| PA     | 90.8±0.05         | 99.9 | 81.4±3.2 | 82.7±2.9 | 99.9 |
| AA     | 55.5±0.3          | 99.9 | 48.4±0.5 | 70.4±0.1 | 99.9 |
| AN     | 10.6±0.4          | NA*  | 15.2±0.5 | 88.2±0.1 | NA*  |
| PAC1   | 49.5±0.4          | 99.9 | 6.3±1.1  | 46±1.7   | 99.9 |
| PAC2   | 52.3±4.5          | 99.9 | 21.1±2.8 | 67±1.2   | 99.9 |

48 \*NA=Not applicable

49

50

51

52

53 **Table S5.** The richness and diversity of microbial community in PL, different cultures, and  
 54 subcultures.

| Bioreactor     | Relative Richness | Shannon (Scaled) | Simpson |
|----------------|-------------------|------------------|---------|
| PL             | 1.0               | 1.63 (0.35)      | 0.53    |
| PACS1 (day 51) | 0.95              | 2.76 (0.59)      | 0.85    |
| PACS2 (day 65) | 0.64              | 1.91 (0.45)      | 0.78    |
| PAC2 (day 25)  | 0.72              | 1.87 (0.43)      | 0.73    |

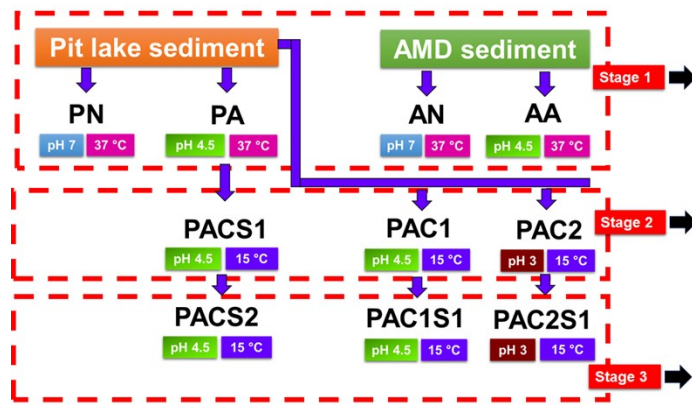

| Culture name                                                 | Inoculum source   | Incubation Temperature | Initial pH |
|--------------------------------------------------------------|-------------------|------------------------|------------|
| <b>STAGE 1</b>                                               |                   |                        |            |
| AMD Neutral (AN)                                             | AMD sediment      | 37 °C                  | 7          |
| AMD Acidic (AA)                                              | AMD sediment      | 37 °C                  | 4.5        |
| Pit Lake Neutral (PN)                                        | Pit Lake sediment | 37 °C                  | 7          |
| Pit Lake Acidic (PA)                                         | Pit Lake sediment | 37 °C                  | 4.5        |
| <b>STAGE 2</b>                                               |                   |                        |            |
| Pit Lake Acidic at Cold Temperature, Subculture 1 (PACS1)    | PA                | 15 °C                  | 4.5        |
| Pit Lake Acidic at Cold Temperature 1 (PAC1)                 | Pit Lake sediment | 15 °C                  | 4.5        |
| Pit Lake Acidic at Cold Temperature 2 (PAC2)                 | Pit Lake sediment | 15 °C                  | 3          |
| <b>STAGE 3</b>                                               |                   |                        |            |
| Pit Lake Acidic at Cold Temperature, Subculture 2 (PACS2)    | PACS1             | 15 °C                  | 4.5        |
| Pit Lake Acidic at Cold Temperature 1, Subculture 1 (PAC1S1) | PAC1              | 15 °C                  | 4.5        |
| Pit Lake Acidic at Cold Temperature 2, Subculture 1 (PAC2S1) | PAC2              | 15 °C                  | 3          |

56

57 **Figure S1.** Schematic representation of the enrichment approach of SRB consortium from pit lake  
 58 and AMD location mine sediments.

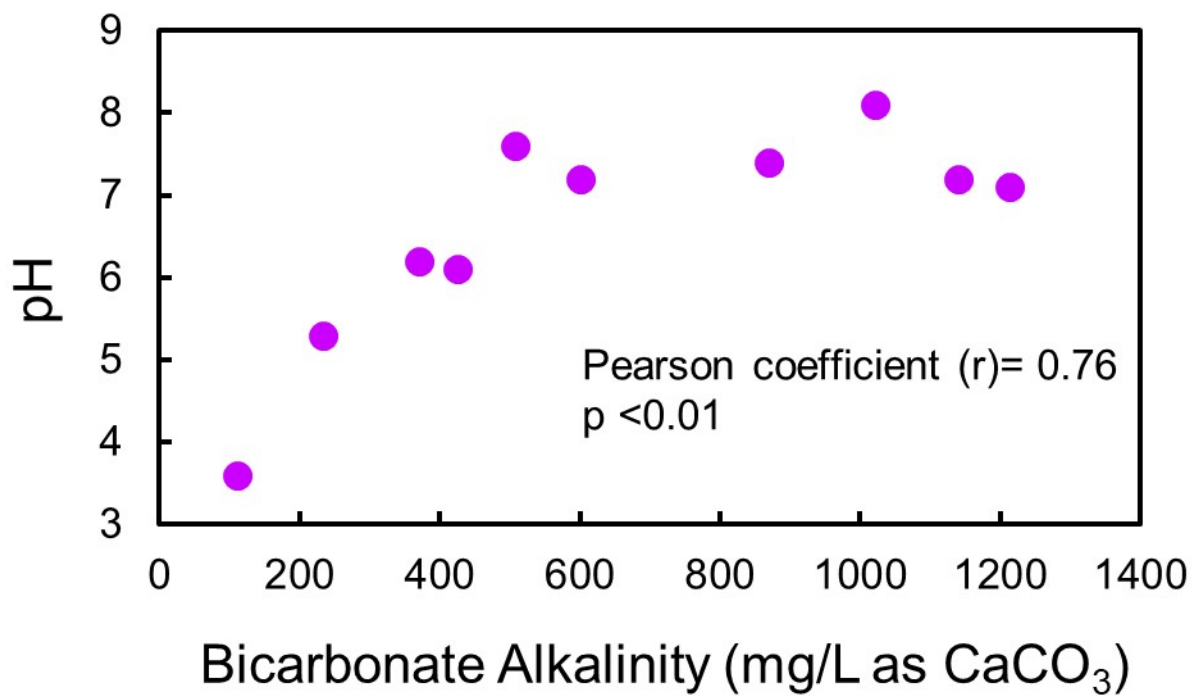

59

60 **Figure S2.** Analysis of the Pearson coefficient (r) and p between pH and bicarbonate alkalinity  
61 produced during enriching the microbial culture in batch bioreactors at varying pH and  
62 temperatures.

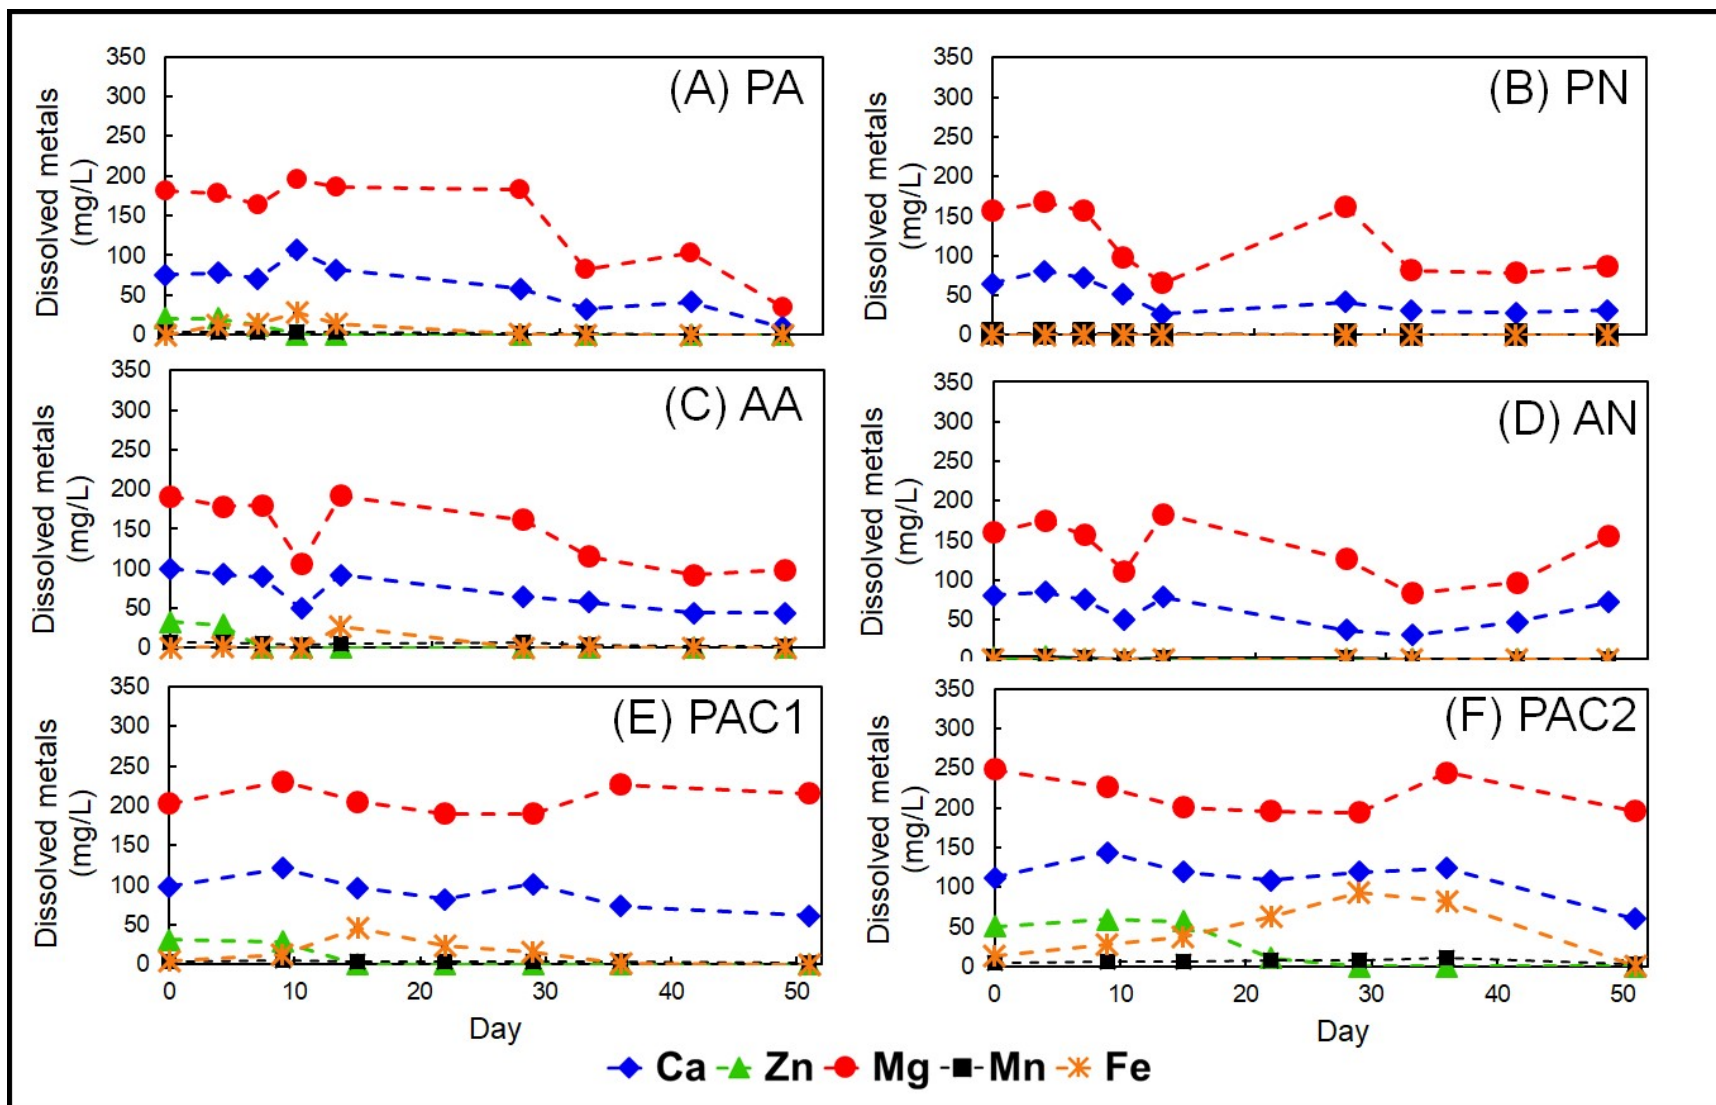

65 **Figure S3.** Profile of residual dissolved metals in the media used for enrichment of SRB community from pit lake sediment.

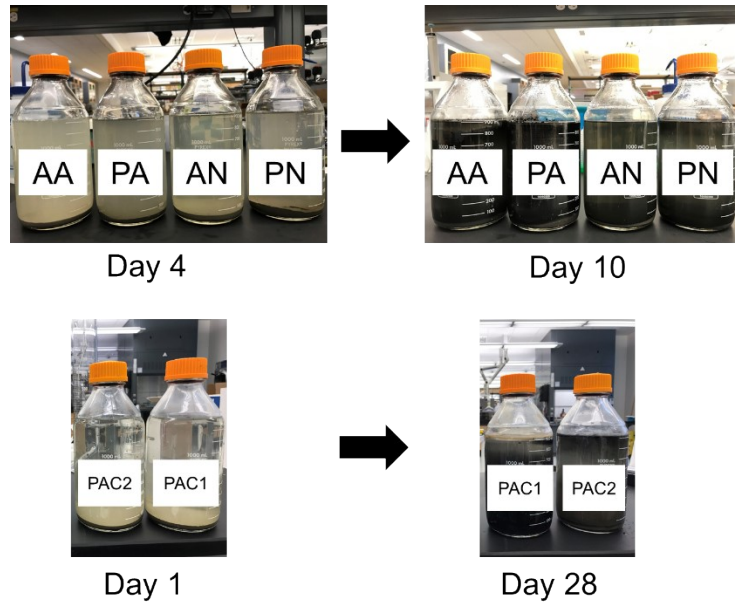

66

67 **Figure S4.** The enrichment of the SRB consortia from sediment. The growth of SRB caused the  
68 blackening of the media due to the formation of iron sulfide precipitates.

69

70



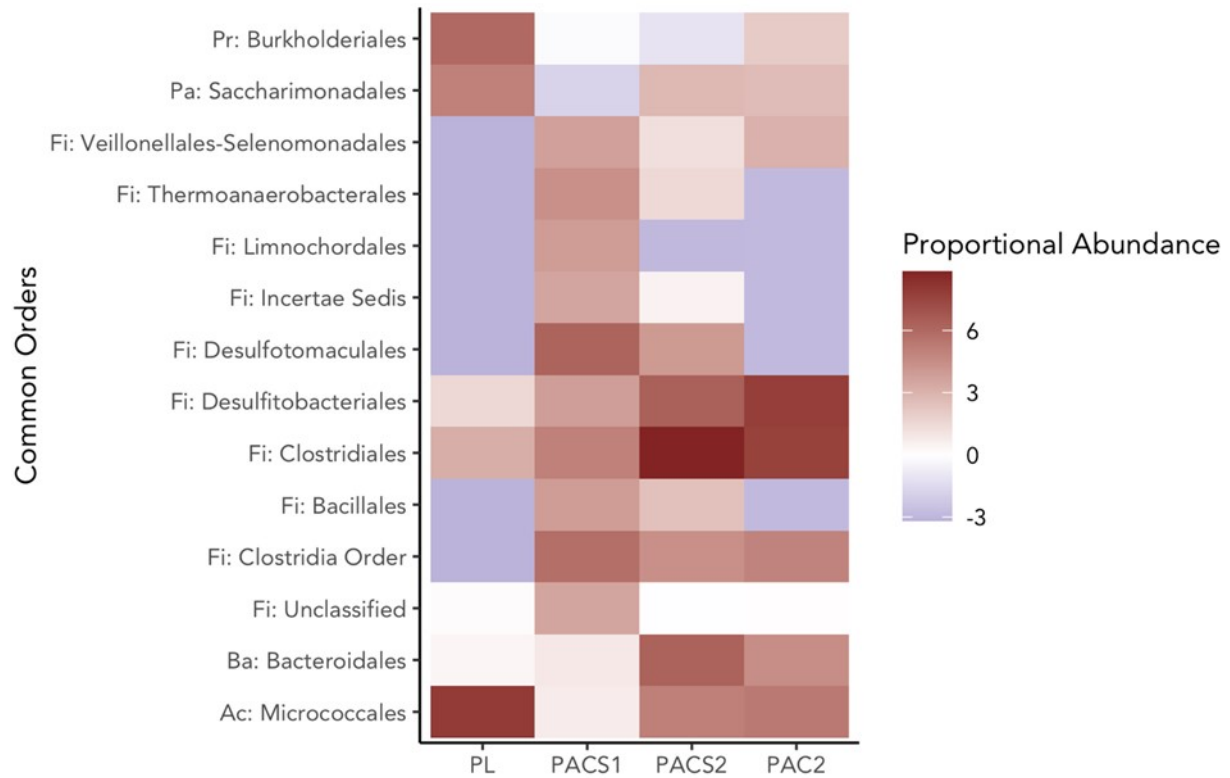

71

72 **Figure S5.** The Major orders of Bacteria present in samples. Orders are preceded by phylum  
 73 abbreviations: Pr = *Proteobacteria*, Pa=*Patescibacteria*, Fi = *Firmicutes*, Ba=*Bacteroidetes*,  
 74 Ac=*Actinobacteria*. Proportional abundances reflect a fold level difference from the geometric  
 75 mean abundance of each sample.

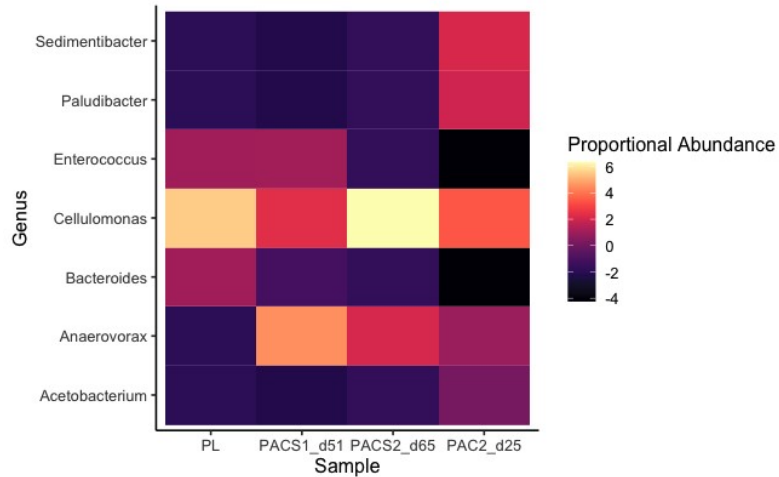

76

77

(A)

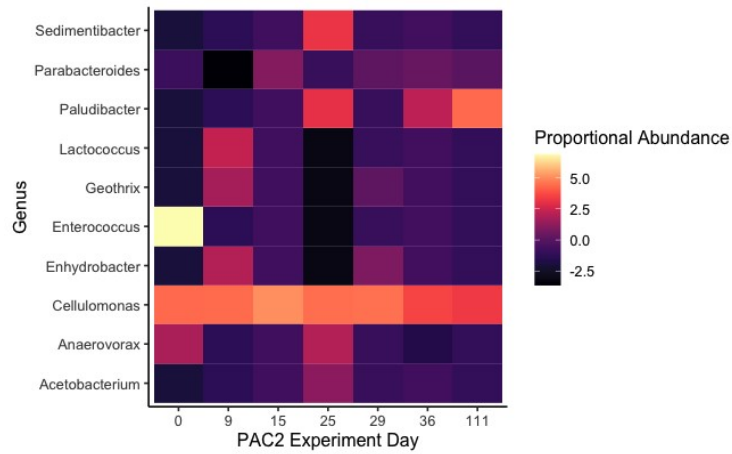

78

79

(B)

80 **Figure S6.** Distribution of fermentative bacteria from PL sediments to enriched inoculum through  
 81 different stages (A), and as a function of incubation time in stage one (B).

82

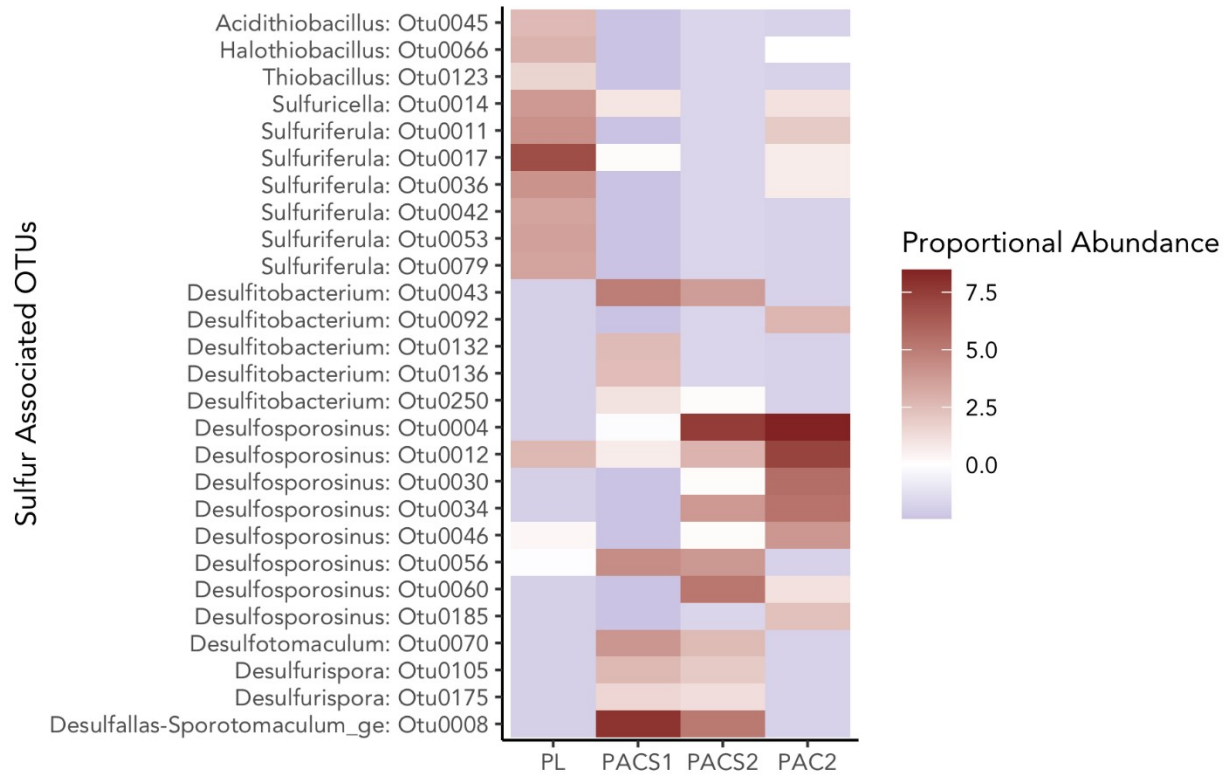

83

84 **Figure S7.** Distribution of the microorganisms involved in the sulfur cycle in PL, PAC2, PACS1,  
 85 and PACS2.

86

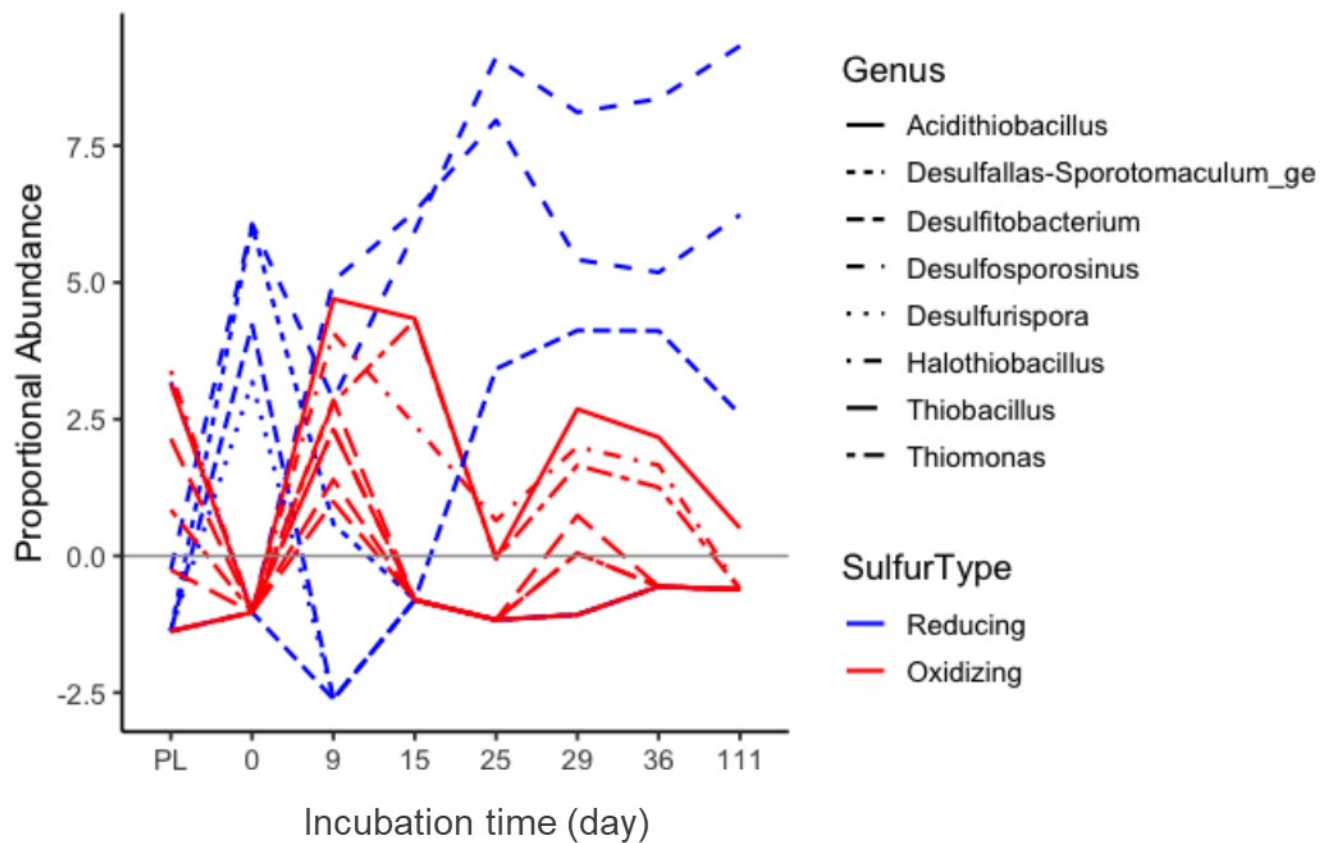

87

88 **Figure S8.** Profile of acidophilic sulfur-oxidizing bacteria and sulfate-reducing bacteria  
89 throughout the enrichment period in PAC2.

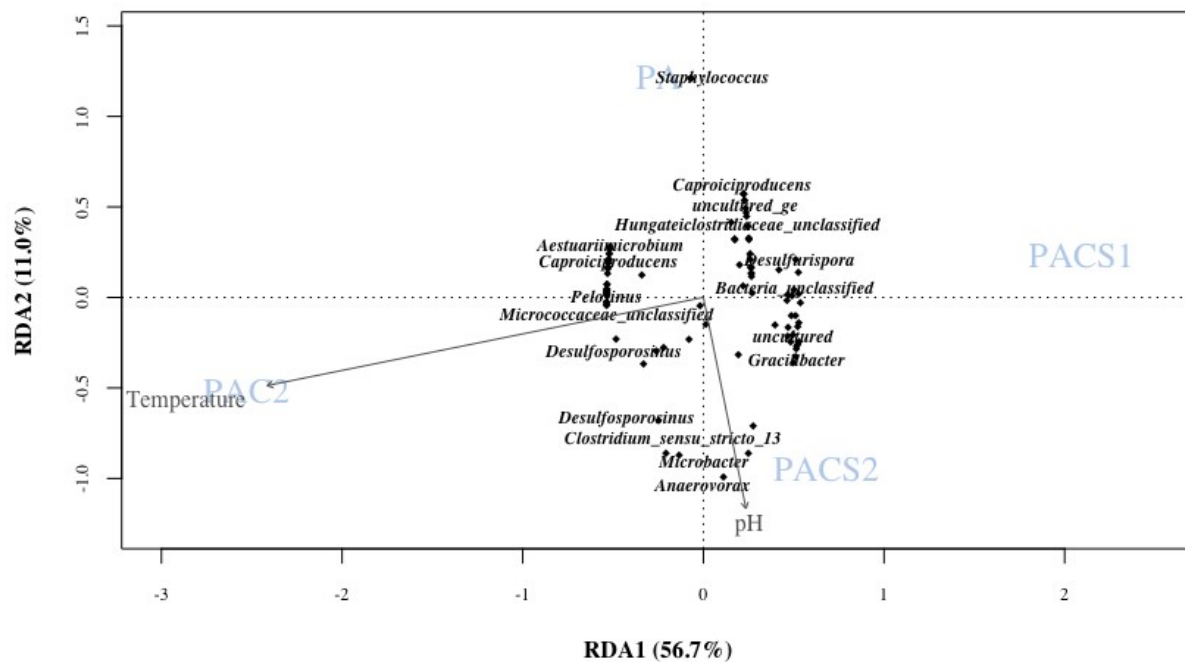

91

92 **Figure S9.** Redundancy analysis between initial pH and incubation temperature, and enriched  
 93 microorganisms for all the bioreactors in stage one to three.

94

95 **Reference.**

96 1. F. Widdel and N. Pfennig, *Archives of Microbiology*, 1981, **129**, 395-400.

97
